# Supplementary material for: Cerium bis(tetradiazepinoporphyrazinate): synthesis and peculiarities of spectral and electrochemical behavior
Source: Royal Society of Chemistry journal article supplement (doi:10.1039/c5nj00884k), 2015-01-01
Supplement: c5nj00884k1.pdf [file c5nj00884k1.pdf]

## New Journal of Chemistry

### Supporting information

# Bis(tetradiazepinoporphyrazinato) cerium: synthesis and peculiarities of spectral and electrochemical behavior

Ekaterina N. Tarakanova,<sup>\*a</sup> Oleg A. Levitskiy,<sup>b</sup> Tatiana V. Magdesieva,<sup>b</sup> Pavel A. Tarakanov,<sup>a</sup> Victor E. Pushkarev<sup>a</sup> and Larisa G. Tomilova<sup>a,b</sup>

<sup>a</sup> Institute of Physiologically Active Compounds, Russian Academy of Sciences, 1 Severnyi proezd, 142432 Chernogolovka, Russian Federation. Fax: +7 49652 49508; E-mail: tarakanova.ek.nik@gmail.com

<sup>b</sup> Department of Chemistry, M.V. Lomonosov Moscow State University, 1 Leninskie Gory, 119991 Moscow, Russian Federation. Fax: +7 495 939 0290; Tel: +7 495 939 1243; E-mail: tom@org.chem.msu.ru

### Table of contents

|                                                                                                                                                               |   |
|---------------------------------------------------------------------------------------------------------------------------------------------------------------|---|
| <b>Fig. S1</b> MALDI-TOF/TOF mass spectrum of <b>3</b>                                                                                                        | 2 |
| <b>Fig. S2</b> IR spectrum of <b>3</b> in CCl <sub>4</sub>                                                                                                    | 2 |
| <b>Fig. S3</b> <sup>1</sup> H NMR spectrum of <b>3</b> in CD <sub>2</sub> Cl <sub>2</sub>                                                                     | 3 |
| <b>Fig. S4</b> <sup>13</sup> C NMR spectrum of <b>3</b> in CD <sub>2</sub> Cl <sub>2</sub>                                                                    | 4 |
| <b>Fig. S5</b> <sup>1</sup> H- <sup>1</sup> H COSY spectrum of <b>3</b> in CD <sub>2</sub> Cl <sub>2</sub>                                                    | 4 |
| <b>Fig. S6</b> <sup>1</sup> H- <sup>13</sup> C HSQC spectrum of <b>3</b> in CD <sub>2</sub> Cl <sub>2</sub>                                                   | 5 |
| <b>Fig. S7</b> CV curves for <b>3</b> recorded at various scan rates (a) and linear plot of $\Delta E_{pp}$ vs. $\lg(\nu)$ (for the first reduction peak) (b) | 5 |

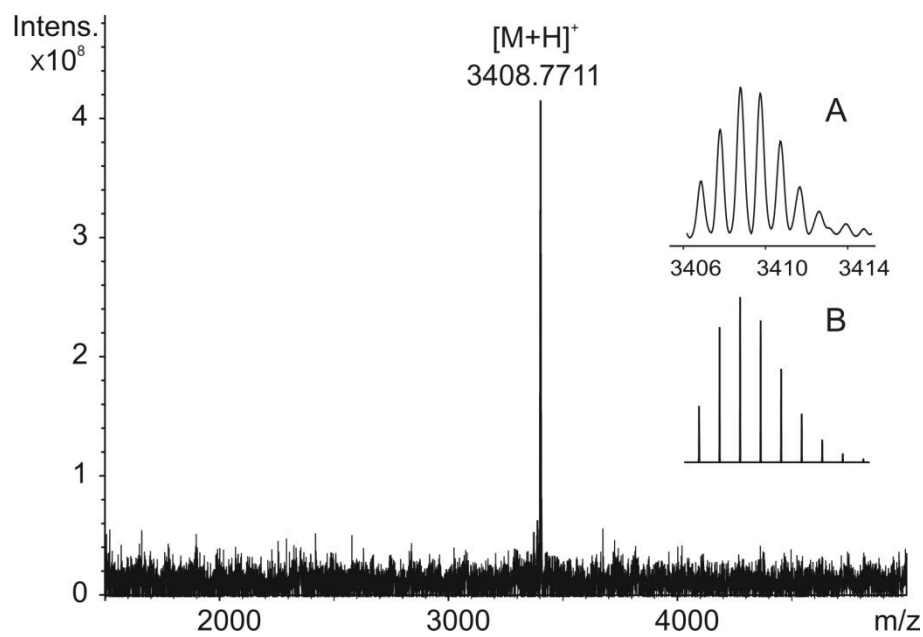

**Fig. S1** MALDI-TOF/TOF mass spectrum of **3**. Inset: isotopic pattern for the molecular ion (A) and simulated MS pattern of the molecular ion (B)

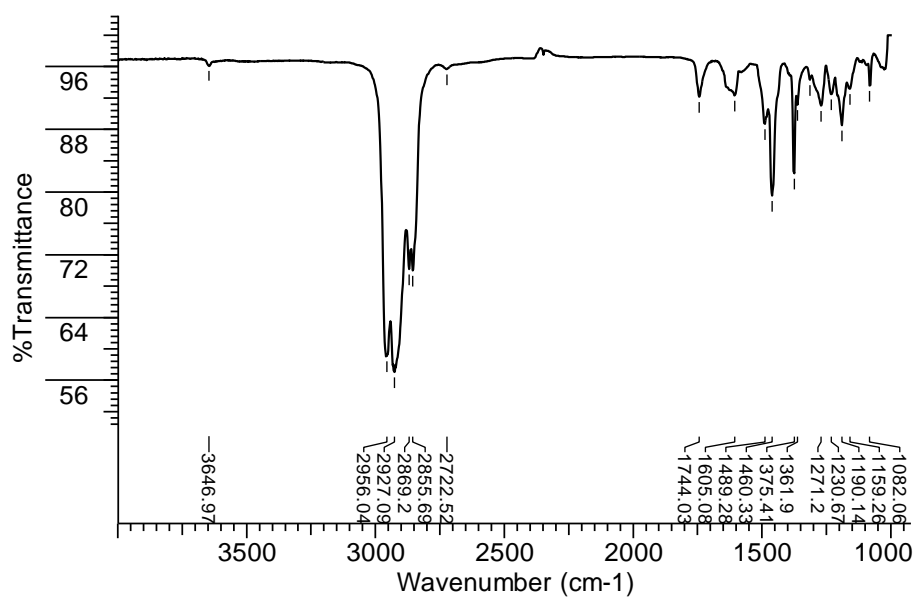

**Fig. S2** IR spectrum of **3** in CCl<sub>4</sub>

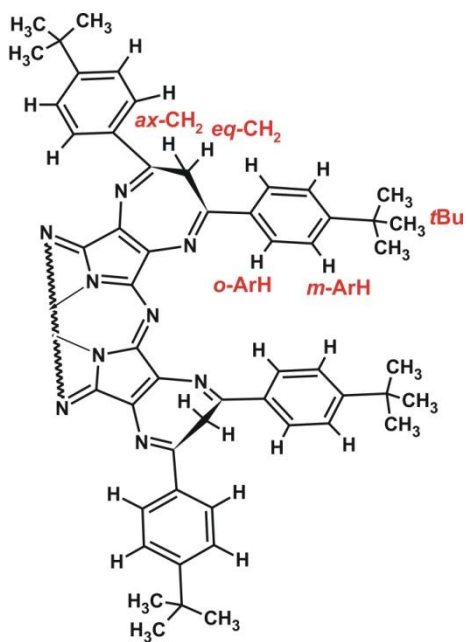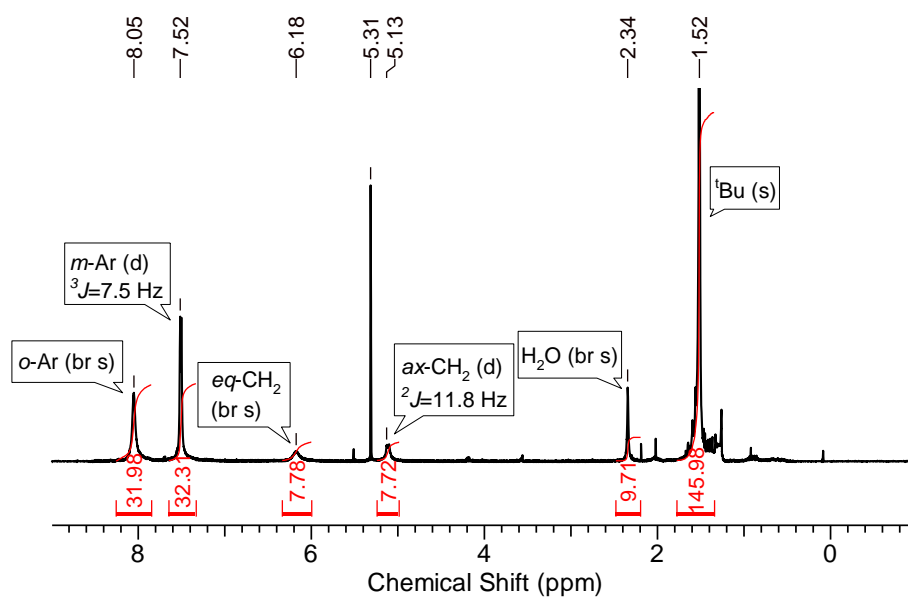

**Fig. S3** <sup>1</sup>H NMR spectrum of **3** in CD<sub>2</sub>Cl<sub>2</sub>

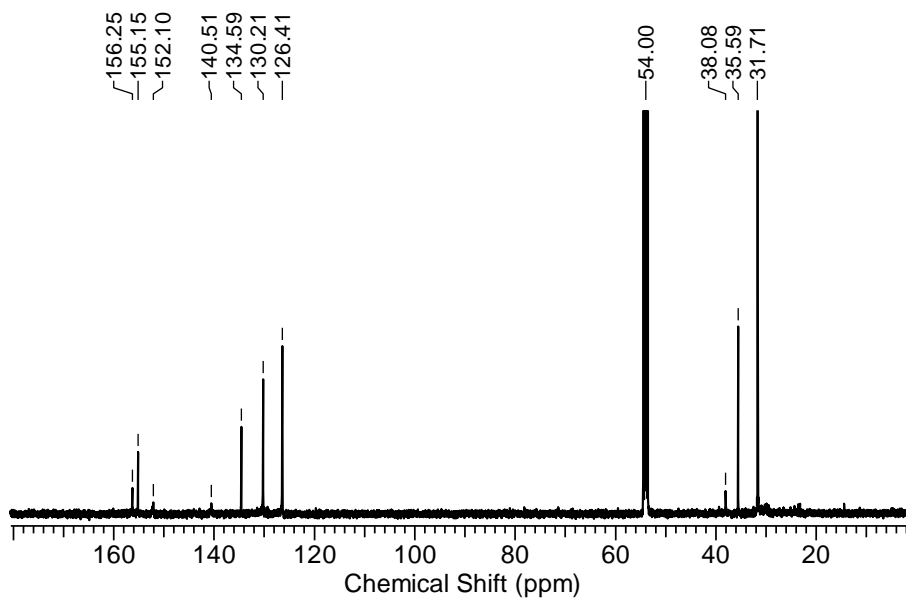

Fig. S4  $^{13}\text{C}$  NMR spectrum of **3** in  $\text{CD}_2\text{Cl}_2$

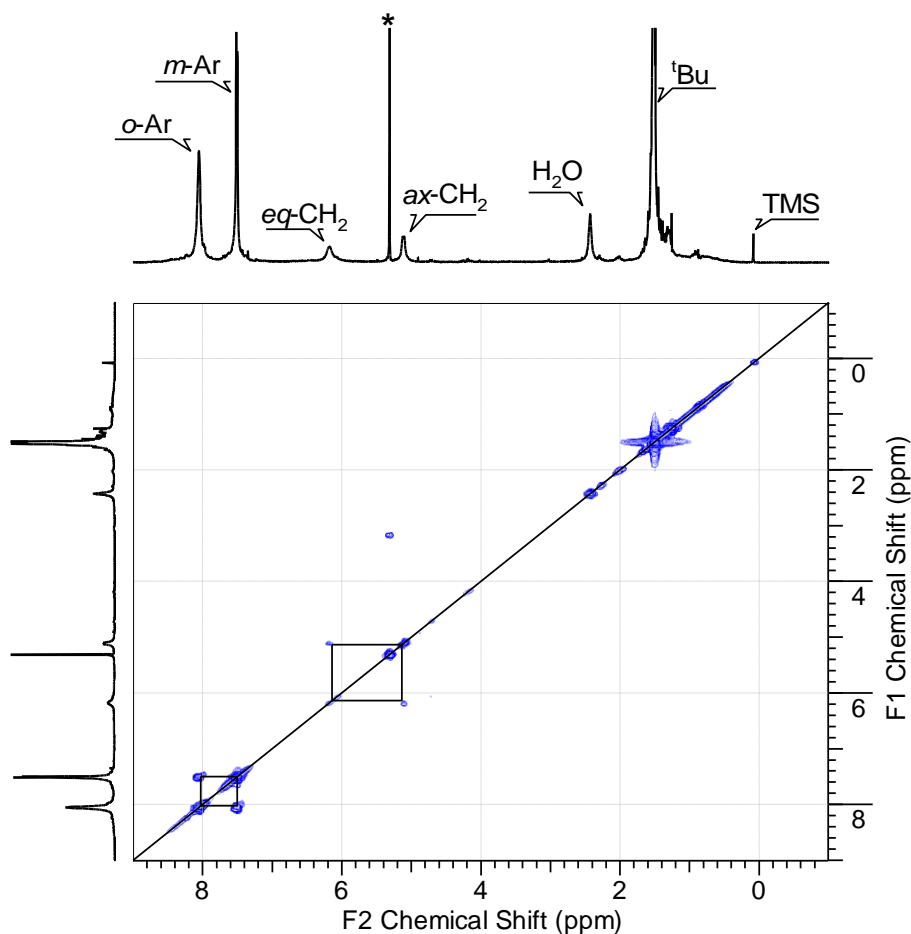

Fig. S5  $^1\text{H}$ - $^1\text{H}$  COSY spectrum of **3** in  $\text{CD}_2\text{Cl}_2$

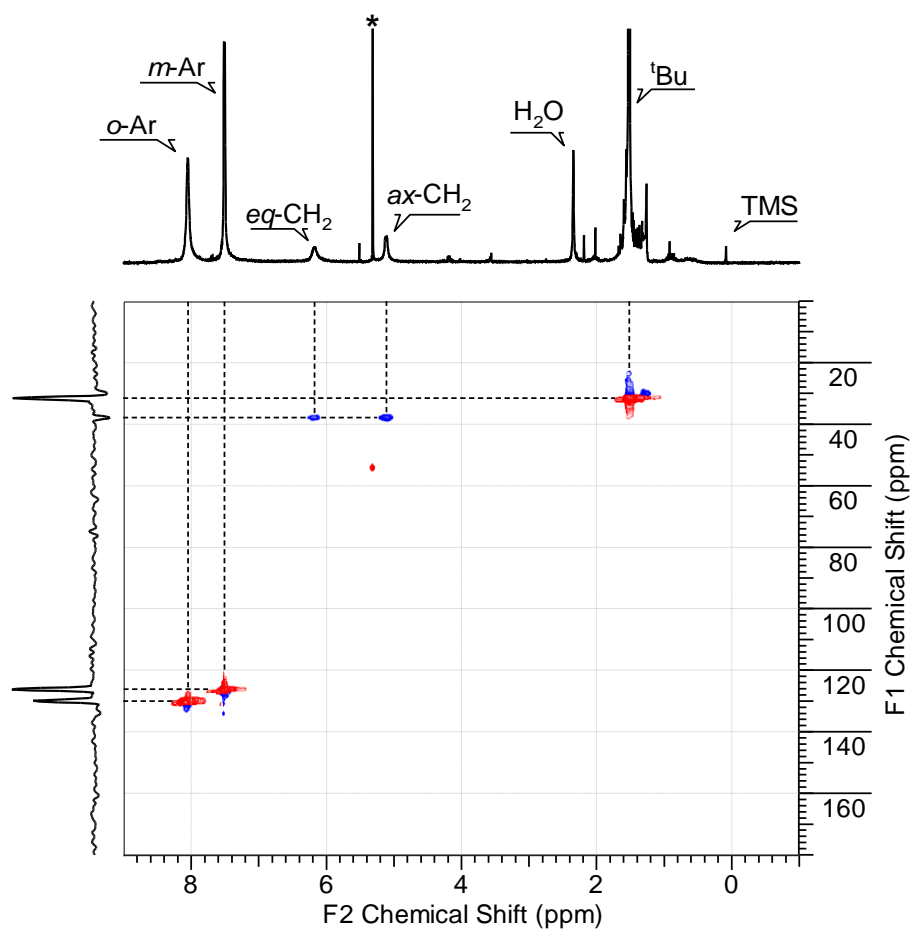

Fig. S6  $^1\text{H}$ - $^{13}\text{C}$  HSQC spectrum of **3** in  $\text{CD}_2\text{Cl}_2$

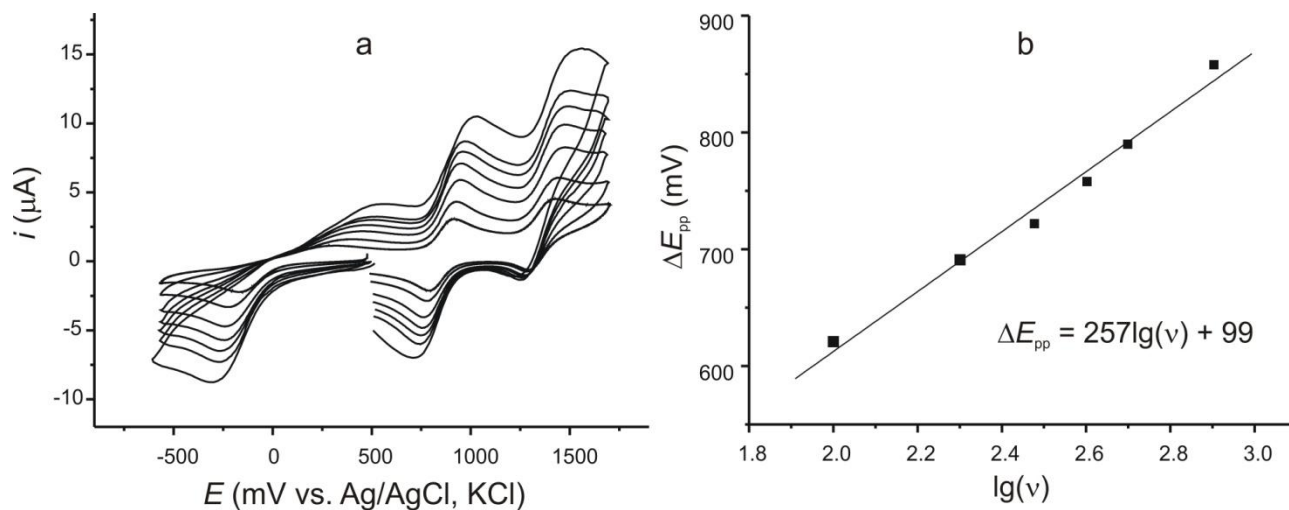

Fig. S7 CV curves for **3** recorded at various scan rates (a) and linear plot of  $\Delta E_{pp}$  vs.  $\lg(v)$  (for the first reduction peak) (b).  
Conditions: *o*-DCB, Pt, 0.15 M  $\text{Bu}_4\text{NBF}_4$ , 100 mV/s, vs. Ag/AgCl/KCl
